# Supplementary material
Source: publisher figshare collection journal article supplement (https://springernature.figshare.com/ndownloader/files/13298531)
Supplement: Supplementary file 1 [file 13298531]

## Sheet: Assessment_Reviewer1
ID	Title	Completeness and clarity of the report						Completeness and clarity of the methods applied
		Description of the aim	Context of evaluation (RCT, design, stage of the design process)	Device	Medical intention or end-users	Results	Overall report quality (0-5)	Number of participants	Profile of the participants	Data collected	Analyses performed	Study design or type of method	Overall methodological quality (0-5)
1	Subcutaneously administered methotrexate for rheumatoid arthritis, by prefilled syringes versus prefilled pens: patient preference and comparison of the self-injection experience.	1	1	1	1	1	5	1	1	1	1	1	5
2	Usability of the Novel Liraglutide 3.0 mg Pen Injector Among Overweight or Obese Adult Patients With or Without Prior Injection Experience.	1	1	1	1	1	5	1	1	1	1	1	5
3	Intelliject's novel epinephrine autoinjector: sharps injury prevention validation and comparable analysis with EpiPen and Twinject.	1	1	1	1	1	5	1	1	1	1	1	5
4	Usability of a new disposable autoinjector platform device: results of a formative study conducted with a broad user population.	1	1	1	1	1	5	1	1	1	0	1	4
5	Usability of devices for self-injection: results of a formative study on a new disposable pen injector.	1	1	1	1	1	5	1	1	0	0	1	3
6	Human factors engineering and design validation for the redesigned follitropin alfa pen injection device.	1	1	1	1	1	5	1	1	1	0	1	4
7	Safe and Effective Use of the Once Weekly Dulaglutide Single-Dose Pen in Injection-Naive Patients With Type 2 Diabetes.	1	1	1	1	1	5	1	1	1	1	1	5
8	Assessing usability, label comprehension, pen robustness and pharmacokinetics of a self-administered prefilled autoinjector pen of methotrexate in patients with rheumatoid arthritis.	1	0	1	1	1	4	1	1	1	0	1	4
9	Intuitiveness, ease of use, and preference of a prefilled growth hormone injection pen: a noninterventional, randomized, open-label, crossover, comparative usability study of three delivery devices in growth hormone-treated pediatric patients.	1	1	1	1	1	5	1	1	1	1	1	5
10	An open-label, multicenter study to evaluate the safe and effective use of the single-use autoinjector with an Avonex(R) prefilled syringe in multiple sclerosis subjects.	1	1	1	1	1	5	1	1	1	1	1	5
11	Comparison of adrenaline auto-injector devices: ease of use and ability to recall use.	1	0	1	1	1	4	1	1	1	1	1	5
12	Comparison of intuitiveness, ease of use and preference among three prefilled, disposable growth hormone injection pens.	1	0	1	1	1	4	1	1	1	1	1	5
13	The recombinant human chorionic gonadotropin prefilled pen: results of patient and nurse human factors usability testing.	1	1	1	1	1	5	1	1	1	1	1	5
14	The redesigned follitropin alfa pen injector: results of the patient and nurse human factors usability testing.	1	1	1	1	1	5	1	1	1	1	1	5
15	Usability and Acceptability of the Abatacept Pre-Filled Autoinjector for the Subcutaneous Treatment of Rheumatoid Arthritis.	1	1	1	1	1	5	1	1	1	1	1	5
16	Comparative Assessment of Lixisenatide, Exenatide, and Liraglutide Pen Devices: A Pilot User-Based Study.	1	1	1	1	1	5	1	1	1	1	1	5
17	Patients' ability to treat anaphylaxis using adrenaline autoinjectors: a randomized controlled trial.	1	1	1	1	1	5	1	1	1	1	1	5
18	Evaluation of pharmacokinetics, user handling, and tolerability of peginterferon alfa-2a (40 kDa) delivered via a disposable autoinjector device.	1	1	1	1	1	5	1	1	1	1	1	5
19	A comparison of 4 epinephrine autoinjector delivery systems: Usability and patient preference.	1	0	1	1	0	3	1	1	1	1	1	5
20	Make-up of the epinephrine autoinjector: The effect on its use by untrained users.	1	0	1	1	1	4	1	1	1	1	1	5
21	Adrenaline autoinjector needle interlocking in the thumb due to improper injection.	0	0	1	1	1	3	1	1	0	1	0	3
22	Use assessment of self-administered epinephrine among food-allergic children and pediatricians.	1	0	1	1	1	4	1	1	1	1	1	5
23	Comparison of patient preference for two insulin injection pen devices in relation to patient dexterity skills.	1	0	1	1	1	4	1	1	1	1	1	5
24	Doctor – How do I use my EpiPen?	1	0	1	1	1	4	1	1	1	1	0	4
25	Demonstration of epinephrine autoinjectors (EpiPen and Anapen) by pharmacists in a randomised, simulated patient assessment: acceptable, but room for improvement	1	1	1	1	1	5	1	1	1	1	1	5
26	Training of trainers on epinephrine autoinjector use.	1	0	1	1	0	3	1	1	1	1	1	5
27	A randomised maternal evaluation of epinephrine autoinjection devices.	1	0	1	1	0	3	1	1	1	1	1	5
28	A Real-Life Study on Acquired Skills from Using an Adrenaline Autoinjector.	1	0	1	1	1	4	1	1	1	1	1	5
29	Design validation and labeling comprehension study for a new epinephrine autoinjector.	1	1	1	1	1	5	1	1	1	1	1	5
30	Evaluation of Usability and Acceptance of a New Autoinjector Intended for Methotrexate Subcutaneous Self-Administration in the Management of Rheumatoid Arthritis.	1	0	1	1	1	4	1	1	1	1	1	5
31	Subcutaneous sumatriptan delivery devices: comparative ease of use and preference among migraineurs.	1	0	1	1	1	4	1	1	1	1	1	5
32	Incomplete and incorrect epinephrine auto-injector training to food-allergic patients by pharmacists in the Netherlands.	1	0	0	1	1	3	1	1	1	1	1	5
33	Community healthcare professionals overestimate the risk of fatal anaphylaxis for food allergic children.	1	0	0	1	1	3	1	1	1	1	1	5
34	Comparative usability study for a certolizumab pegol autoinjection device in patients with rheumatoid arthritis.	1	0	1	1	1	4	1	1	1	1	1	5
35	Usability of a novel disposable autoinjector device for ixekizumab: results from a qualitative study and an open-label clinical trial, including patient-reported experience.	1	1	1	1	1	5	1	1	1	0	1	4
36	Application of human factors engineering (HFE) to the design of a naloxone auto-injector for the treatment of opioid emergencies.	0	1	1	1	1	4	1	1	0	0	1	3
37	Usability engineering study in the European Union of a redesigned follitropin alfa pen injector for infertility treatment.	1	1	1	1	1	5	1	1	1	0	1	4
38	Evaluation of a novel autoinjector for subcutaneous self-administration of belimumab in systemic lupus erythematosus.	1	1	1	1	1	5	1	1	1	1	1	5
						Mean	4.36842					Mean	4.68421
						Median	5					Median	5

## Sheet: Assessment_Reviewer2
ID	Title	Completeness and clarity of the report						Completeness and clarity of the methods applied
		Description of the aim	Context of evaluation (RCT, design, stage of the design process)	Device	Medical intention or end-users	Results	Overall report quality (0-5)	Number of participants	Profile of the participants	Data collected	Analyses performed	Study design or type of method	Overall methodological quality (0-5)
1	Subcutaneously administered methotrexate for rheumatoid arthritis, by prefilled syringes versus prefilled pens: patient preference and comparison of the self-injection experience.	1	1	1	1	1	5	1	1	1	1	1	5
2	Usability of the Novel Liraglutide 3.0 mg Pen Injector Among Overweight or Obese Adult Patients With or Without Prior Injection Experience.	1	1	1	1	1	5	1	1	1	1	1	5
3	Intelliject's novel epinephrine autoinjector: sharps injury prevention validation and comparable analysis with EpiPen and Twinject.	1	1	1	1	1	5	1	1	1	1	1	5
4	Usability of a new disposable autoinjector platform device: results of a formative study conducted with a broad user population.	1	1	1	1	1	5	1	1	1	1	1	5
5	Usability of devices for self-injection: results of a formative study on a new disposable pen injector.	1	1	1	1	1	5	0	1	1	1	1	4
6	Human factors engineering and design validation for the redesigned follitropin alfa pen injection device.	1	1	1	1	1	5	1	1	1	1	1	5
7	Safe and Effective Use of the Once Weekly Dulaglutide Single-Dose Pen in Injection-Naive Patients With Type 2 Diabetes.	1	1	1	1	1	5	1	1	1	1	1	5
8	Assessing usability, label comprehension, pen robustness and pharmacokinetics of a self-administered prefilled autoinjector pen of methotrexate in patients with rheumatoid arthritis.	1	1	1	1	1	5	1	1	1	1	1	5
9	Intuitiveness, ease of use, and preference of a prefilled growth hormone injection pen: a noninterventional, randomized, open-label, crossover, comparative usability study of three delivery devices in growth hormone-treated pediatric patients.	1	1	1	1	1	5	1	1	1	1	1	5
10	An open-label, multicenter study to evaluate the safe and effective use of the single-use autoinjector with an Avonex(R) prefilled syringe in multiple sclerosis subjects.	1	1	1	1	1	5	1	1	1	1	1	5
11	Comparison of adrenaline auto-injector devices: ease of use and ability to recall use.	1	1	1	1	1	5	1	1	1	1	1	5
12	Comparison of intuitiveness, ease of use and preference among three prefilled, disposable growth hormone injection pens.	1	1	1	1	1	5	1	1	1	1	1	5
13	The recombinant human chorionic gonadotropin prefilled pen: results of patient and nurse human factors usability testing.	1	1	1	1	1	5	0	1	1	1	1	4
14	The redesigned follitropin alfa pen injector: results of the patient and nurse human factors usability testing.	1	1	1	1	1	5	1	1	1	1	1	5
15	Usability and Acceptability of the Abatacept Pre-Filled Autoinjector for the Subcutaneous Treatment of Rheumatoid Arthritis.	1	1	1	1	1	5	1	1	1	1	1	5
16	Comparative Assessment of Lixisenatide, Exenatide, and Liraglutide Pen Devices: A Pilot User-Based Study.	1	1	1	1	1	5	1	1	1	1	1	5
17	Patients' ability to treat anaphylaxis using adrenaline autoinjectors: a randomized controlled trial.	1	1	1	1	1	5	0	1	1	1	1	4
18	Evaluation of pharmacokinetics, user handling, and tolerability of peginterferon alfa-2a (40 kDa) delivered via a disposable autoinjector device.	1	1	1	1	1	5	1	1	1	1	1	5
19	A comparison of 4 epinephrine autoinjector delivery systems: Usability and patient preference.	1	0	1	1	1	4	1	1	1	1	0	4
20	Make-up of the epinephrine autoinjector: The effect on its use by untrained users.	1	0	1	1	1	4	1	1	0	1	1	4
21	Adrenaline autoinjector needle interlocking in the thumb due to improper injection.	0	0	1	1	1	3	0	1	1	1	0	3
22	Use assessment of self-administered epinephrine among food-allergic children and pediatricians.	1	0	1	1	0	3	1	1	1	0	1	4
23	Comparison of patient preference for two insulin injection pen devices in relation to patient dexterity skills.	1	0	1	1	1	4	1	1	1	1	1	5
24	Doctor – How do I use my EpiPen?	1	0	1	1	1	4	1	1	1	1	0	4
25	Demonstration of epinephrine autoinjectors (EpiPen and Anapen) by pharmacists in a randomised, simulated patient assessment: acceptable, but room for improvement	1	1	1	1	1	5	1	1	1	1	1	5
26	Training of trainers on epinephrine autoinjector use.	1	0	1	1	0	3	1	1	1	1	1	5
27	A randomised maternal evaluation of epinephrine autoinjection devices.	1	0	1	1	1	4	1	1	1	1	1	5
28	A Real-Life Study on Acquired Skills from Using an Adrenaline Autoinjector.	1	1	1	1	0	4	1	1	1	0	1	4
29	Design validation and labeling comprehension study for a new epinephrine autoinjector.	1	1	1	1	1	5	1	1	1	1	1	5
30	Evaluation of Usability and Acceptance of a New Autoinjector Intended for Methotrexate Subcutaneous Self-Administration in the Management of Rheumatoid Arthritis.	1	1	1	1	1	5	1	1	1	1	1	5
31	Subcutaneous sumatriptan delivery devices: comparative ease of use and preference among migraineurs.	1	1	1	1	1	5	0	1	1	1	1	4
32	Incomplete and incorrect epinephrine auto-injector training to food-allergic patients by pharmacists in the Netherlands.	1	0	0	1	1	3	1	1	1	1	0	4
33	Community healthcare professionals overestimate the risk of fatal anaphylaxis for food allergic children.	1	0	0	1	1	3	1	1	1	1	1	5
34	Comparative usability study for a certolizumab pegol autoinjection device in patients with rheumatoid arthritis.	1	1	1	1	1	5	1	1	1	1	1	5
35	Usability of a novel disposable autoinjector device for ixekizumab: results from a qualitative study and an open-label clinical trial, including patient-reported experience.	1	1	1	1	1	5	1	1	1	0	1	4
36	Application of human factors engineering (HFE) to the design of a naloxone auto-injector for the treatment of opioid emergencies.	0	1	1	1	1	4	1	1	0	0	1	3
37	Usability engineering study in the European Union of a redesigned follitropin alfa pen injector for infertility treatment.	1	1	1	1	1	5	1	1	1	0	1	4
38	Evaluation of a novel autoinjector for subcutaneous self-administration of belimumab in systemic lupus erythematosus.	1	1	1	1	1	5	1	1	1	1	1	5
						Mean	4.55263					Mean	4.57895
						Median	5					Median	5

## Sheet: Final
	Report assessment				Method assessment
Mean Reviewer1	4.36842			Mean Reviewer1	4.68421
Mean Reviewer2	4.55263			Mean Reviewer2	4.57895
	4.46053				4.63158
Median	5			Median	5
